# Supplementary material for: Electrostatic self-assembled graphene oxide-collagen scaffolds towards a three-dimensional microenvironment for biomimetic applications
Source: Royal Society of Chemistry journal article supplement (doi:10.1039/c6ra10213a), 2016-01-01
Supplement: c6ra10213a1.pdf [file c6ra10213a1.pdf]

**Supporting Information for**

**Electrostatic self-assembled graphene oxide-  
collagen scaffolds towards a three-dimensional  
microenvironment for biomimetic applications**

*André F. Girão<sup>1</sup>, Gil Gonçalves<sup>1</sup>, Kulraj S. Bhangra<sup>2</sup>, James B. Phillips<sup>2</sup>, Jonathan Knowles<sup>2</sup>, Gonzalo Hurieta<sup>1</sup>, Manoj K. Singh<sup>1</sup>, Igor Bdkin<sup>1</sup>, António Completo<sup>1</sup>, Paula A. A. P. Marques<sup>1\*</sup>.*

<sup>1</sup>TEMA, Department of Mechanical Engineering, University of Aveiro, 3810-193 Aveiro,  
Portugal

<sup>2</sup>Department of Biomaterials and Tissue Engineering, UCL Eastman Dental Institute,  
University College London, 256 Gray's Inn Road, London WC1X 8LD, United Kingdom.

## Hydrogel formation testing

Figure S1 describes the influence of the medium pH and the collagen/GO w/w ratio relatively to the gelation process. It is observable that only a few GO-Col samples have passed the tube inversion test and therefore were considered to be consistent and stable hydrogels. It is also noticed that the collagen % needed to crosslink the GO sheets decreases with the increasing pH.

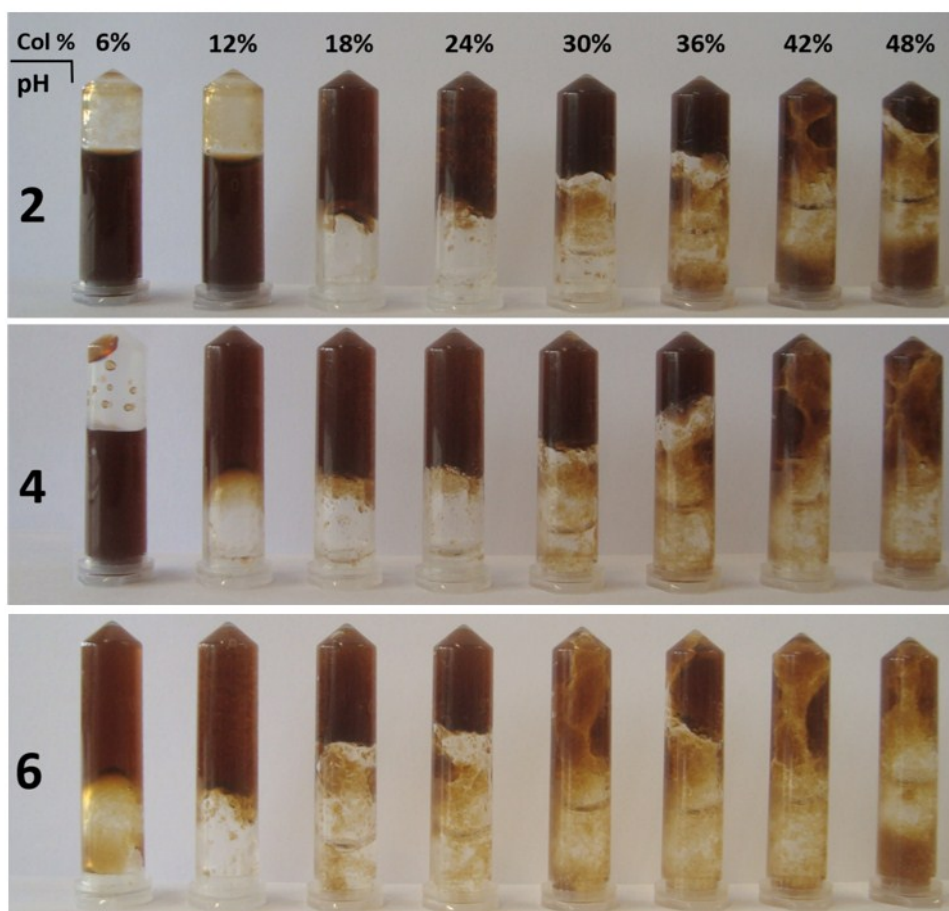

**Figure S1.** Photographs of 4 mg/mL GO solutions mixed and shaken with collagen at different weight ratios and pH values: 2; 4 and 6. From left to right, Col/GO (w/w %) = 6, 12, 18, 24, 30, 36, 42 and 48.

## XPS analysis

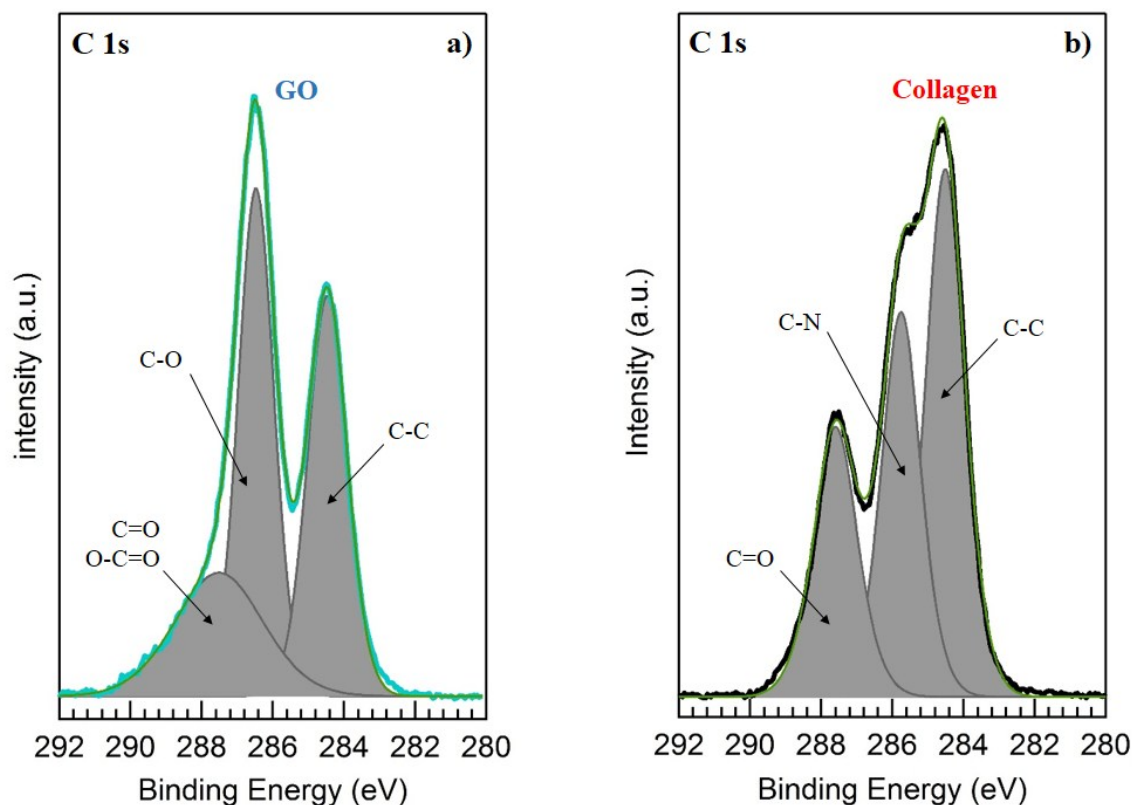

**Figure S2.** Normalized C1s core levels obtained for a) GO and b) collagen.

**Table S 1.** Elemental composition of GO and collagen samples obtained by XPS.

|                 | Functional group | BE (eV) | FWHM (eV) | at. % |
|-----------------|------------------|---------|-----------|-------|
| <i>GO</i>       | C-C              | 284.5   | 1.3       | 35    |
|                 | C-O              | 286.5   | 1.2       | 41    |
|                 | C=O and O-C=O    | 287.5   | 2.9       | 24    |
| <i>Collagen</i> | C-C              | 284.5   | 1.3       | 44    |
|                 | C-N              | 285.7   | 1.4       | 32    |
|                 | C=O              | 287.6   | 1.3       | 24    |

## AFM friction tests

Relatively to the AFM friction tests, the nominal adhesion energy ( $W_{adh}$ ) can be obtained from the adhesion force ( $F_{adh}$ ) between a sphere and a flat surface by the Maugis–Dugdale theory  $W_{adh} = F_{adh}/(\lambda\pi R_{tip})$ , by assuming that both surfaces are ideal (without roughness).<sup>1</sup> In case of  $SiO_2$  cantilever tip  $\lambda$  is equal to  $1.66^2$  and  $R_{tip}$  is equal to 10nm (PPP-CONTR, Nanosensors). In our studies it was observed higher adhesion force for collagen at GO surface than for pure collagen, 0.132 Jm<sup>2</sup> and 0.045 Jm<sup>2</sup> respectively (Table S2). These results showed a stronger interaction between collagen molecules and  $SiO_2$  cantilever tip that could be attributed to the higher induced ordering<sup>3</sup> or even functionalization<sup>4</sup> of molecular collagen at GO surface.

**Table S 2.** Friction coefficient ( $K_{fri}$ ), adhesion force ( $F_{adh}$ ) and adhesion energy ( $W_{adh}$ ) for GO, Collagen and Go-Col obtained from the respective Frictional versus load curves.

|                 | <b><math>k_{fric}</math></b> | <b><math>F_{adh}</math> (nN)</b> | <b><math>W_{adh}</math> (J m<sup>2</sup>)</b> |
|-----------------|------------------------------|----------------------------------|-----------------------------------------------|
| <b>GO</b>       | 0.22                         | 5.7                              | 0.109                                         |
| <b>Collagen</b> | 0.02                         | 2.38                             | 0.046                                         |
| <b>GO-Col</b>   | 0.13                         | 6.9                              | 0.132                                         |

## Swelling tests

Figure S3 shows how the pH of the medium and the % of Col used during the GO-Col hydrogel synthesis affected the swelling ratio of the GO-Col scaffolds. It is observable that the swelling equilibrium is achieved in the first hour of MilliQ water immersion. The compressive moduli of the GO-Col scaffolds at dry and wet states were determined by analysing the stress-strain curves (Fig. S4, S5 and S6). The final results are presented in Fig S7, where it is possible to observe not only the effect of the pH and the % Col present into the system, but also the influence of the water uptake on the mechanical properties of each GO-Col scaffold.

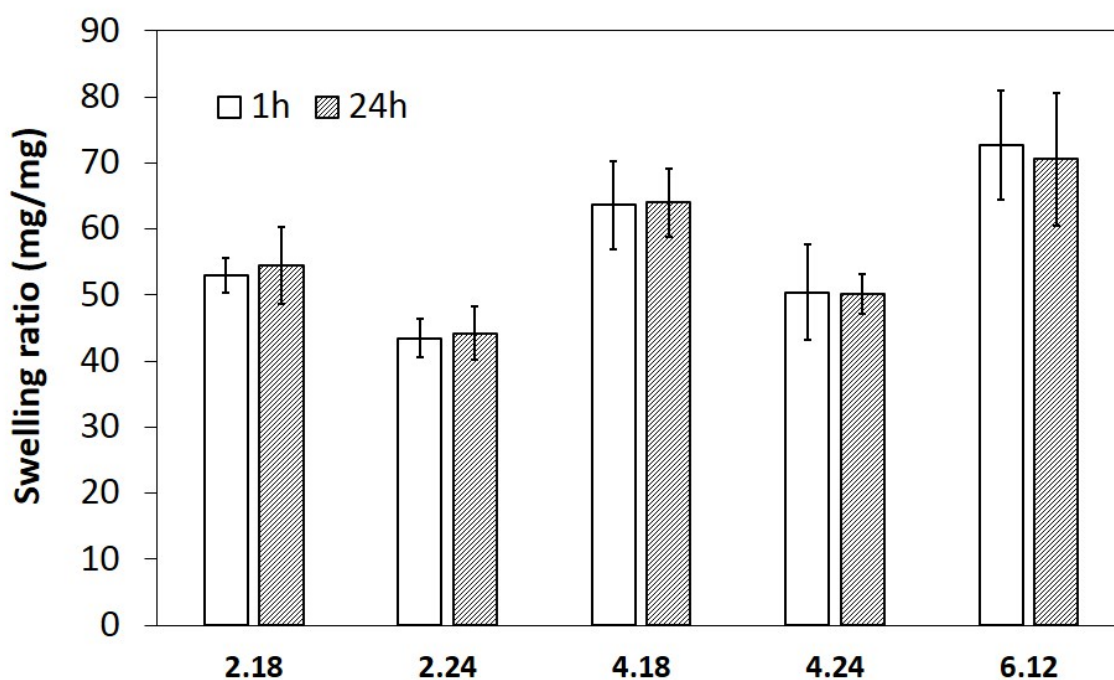

**Figure S 3.** Swelling ratio of the GO-Col scaffolds after 1h and 24h.

## Compressive stress-strain curves of the GO-Col scaffolds

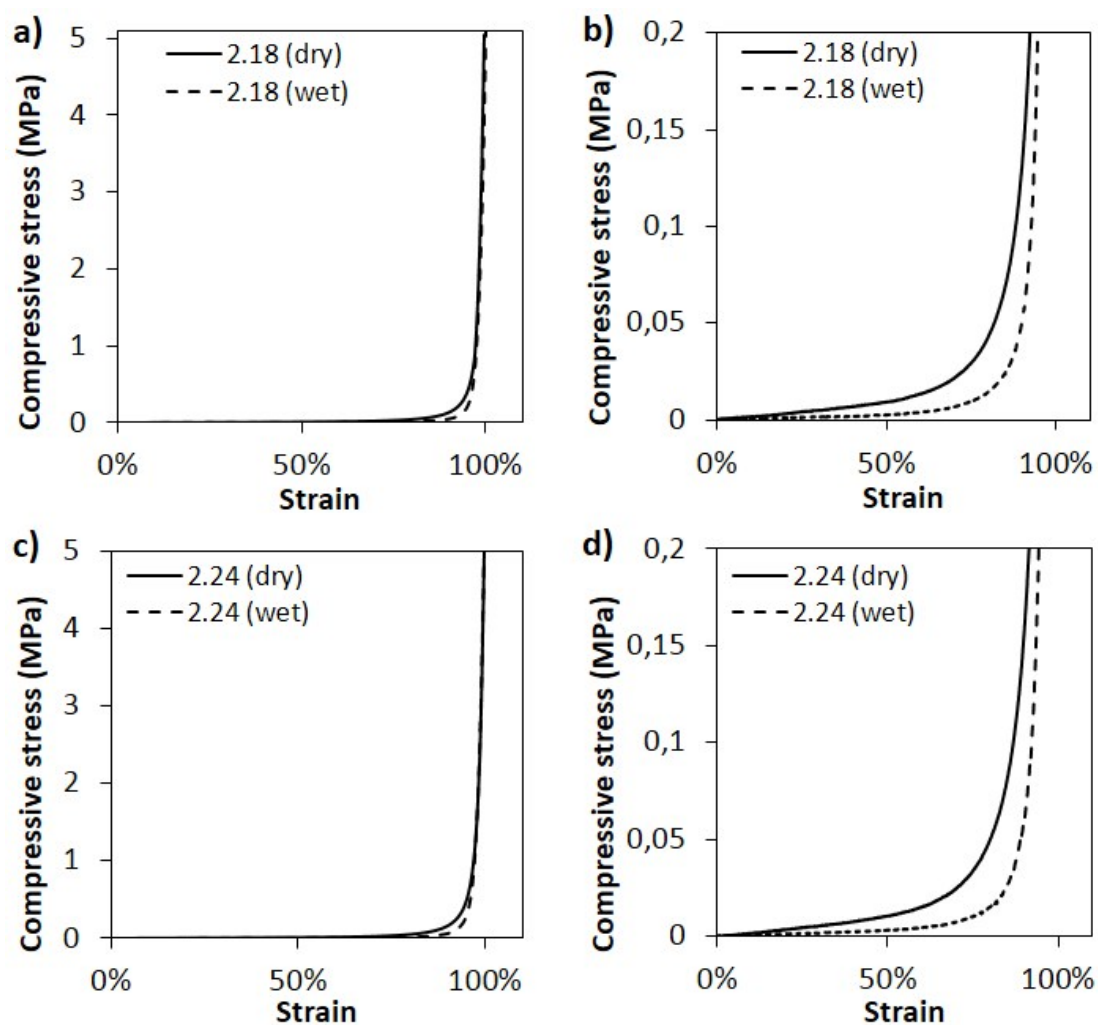

**Figure S4.** Compressive stress-strain curves of the GO-Col scaffolds at pH 2. **a-b)** 18% of collagen/GO w/w ratio; **c-d)** 24% of collagen / GO w/w ratio.

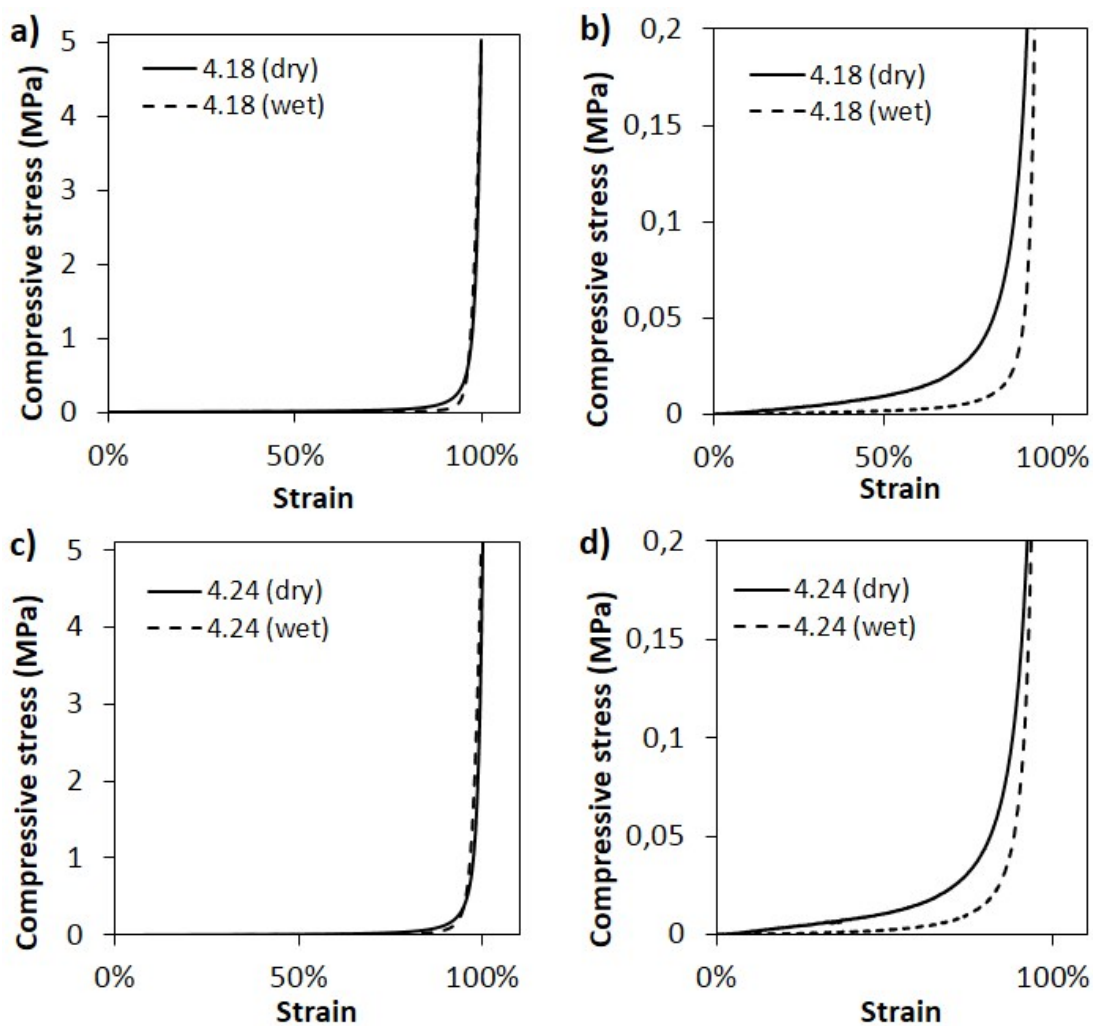

**Figure S5.** Compressive stress-strain curves of the GO-Col scaffolds at pH 4. **a-b)** 18% of collagen/GO w/w ratio; **c-d)** 24% of collagen / GO w/w ratio.

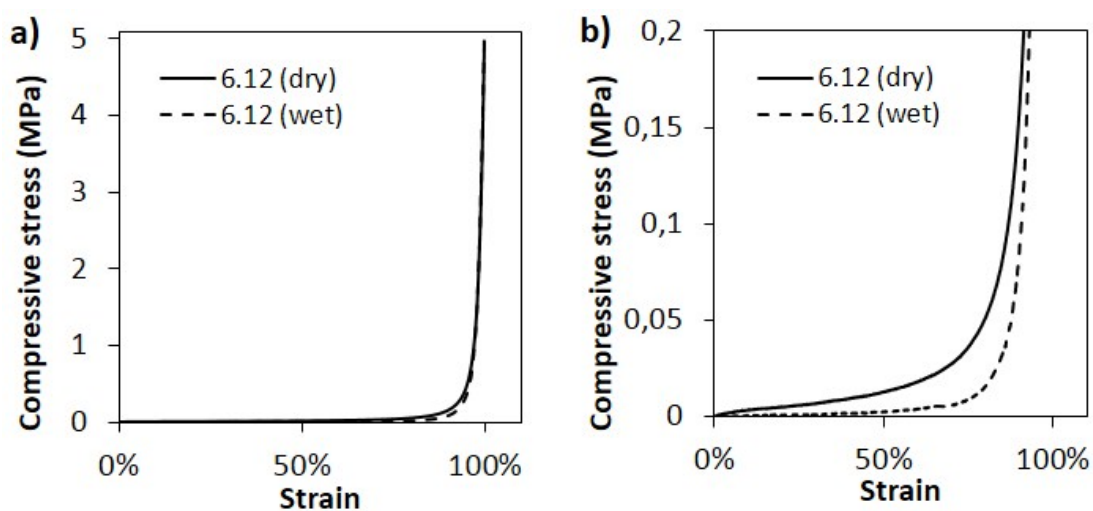

**Figure S6.** Compressive stress-strain curves of the GO-Col scaffolds at pH 6. **a-b)** 18% of collagen/GO w/w ratio.

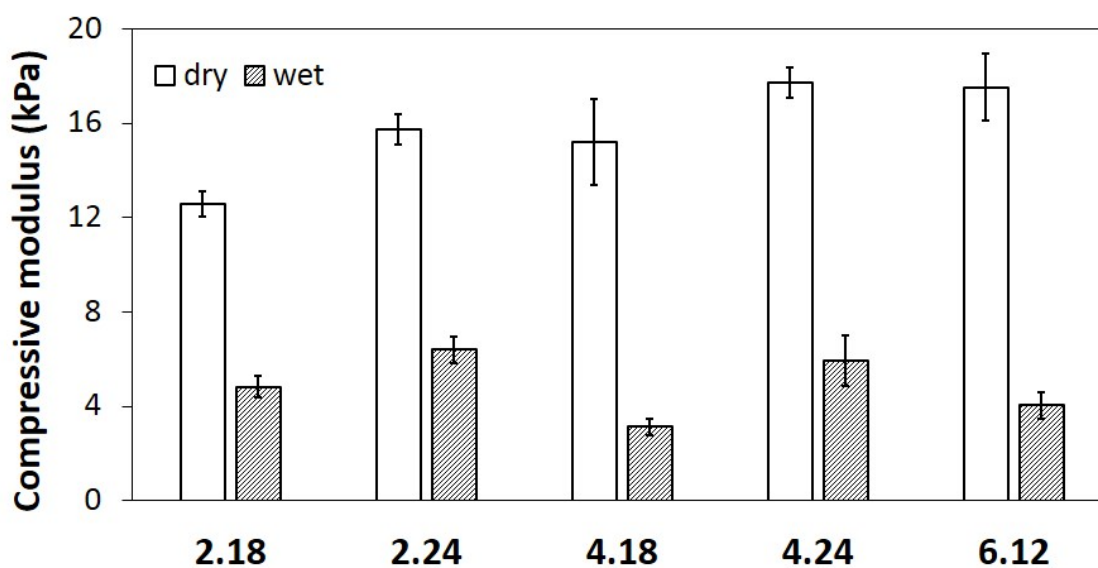

**Figure S7.** Comparison of the compressive moduli of the GO-Col scaffolds at the dry and wet states.

## Quantitative analysis using XPS

**Table S 3.** Elemental composition of rGO-Col and GO-Col samples obtained by XPS.

| Sample         | C1s fit                                        |            |              |         | C1s /<br>O1s<br>ratio | C1s /<br>N1s<br>ratio |
|----------------|------------------------------------------------|------------|--------------|---------|-----------------------|-----------------------|
|                | Functional<br>group                            | BE<br>(eV) | FWHM<br>(eV) | at. (%) |                       |                       |
| <i>rGO-Col</i> | C Sp <sup>2</sup>                              | 284.5      | 0.8          | 34      | 5                     | 9.6                   |
|                | C Sp <sup>3</sup> / C-N                        | 285.1      | 1.3          | 30      |                       |                       |
|                | C-O                                            | 286.2      | 1.3          | 23      |                       |                       |
|                | C=O                                            | 288.0      | 1.6          | 13      |                       |                       |
| <i>GO-Col</i>  | C Sp <sup>2</sup> / C Sp <sup>3</sup> /<br>C-N | 284.5      | 2.6          | 65      | 2.4                   | 9.4                   |
|                | C=O / C-O                                      | 286.5      | 2.1          | 35      |                       |                       |

## Swelling and compression tests of GO-Col and rGO-Col

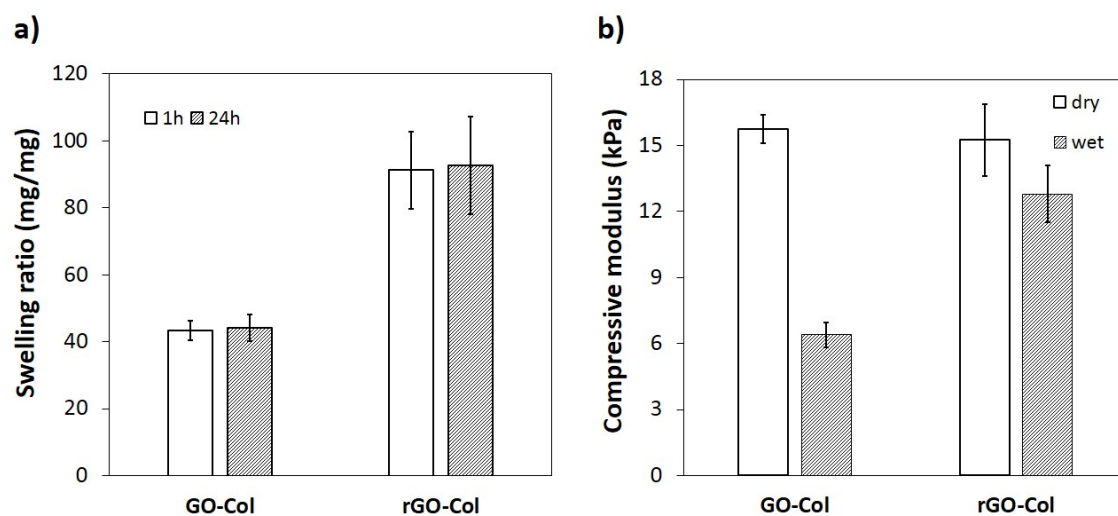

**Figure S 8.** Comparison of a) the swelling ratio and b) compressive modulus of the GO-Col and rGO-Col.

## References:

1. T. Jiang and Y. Zhu, *Nanoscale*, 2015, **7**, 10760-10766.
2. R. W. Carpick, D. F. Ogletree and M. Salmeron, *J. Colloid Interface Sci.*, 1999, **211**, 395-400.
3. Y. Shin, J. Lee, L. Jin, M. Kim, Y.-J. Kim, J. Hyun, T.-G. Jung, S. Hong and D.-W. Han, *Journal of Nanobiotechnology*, 2015, **13**, 21.
4. G. Tronci, C. A. Grant, N. H. Thomson, S. J. Russell and D. J. Wood, *Journal of The Royal Society Interface*, 2014, **12**.
